# Supplementary material for: Evaluation of electronic polarization energy in oligoacene molecular crystals using the solvated supermolecular approach
Source: Royal Society of Chemistry journal article supplement (doi:10.1039/c7cp01534h), 2017-01-01
Supplement: c7cp01534h1.pdf [file c7cp01534h1.pdf]

## Supplementary Information

### **Evaluation of Electronic Polarization energy in Oligoacene Molecular Crystals Using solvated supermolecular approach**

Tao Xu<sup>a</sup>, Wenliang Wang<sup>a</sup>, Shiwei Yin<sup>a\*</sup> and Yun Wang<sup>b</sup>

<sup>a</sup>Key Laboratory for Macromolecular Science of Shaanxi Province, School of Chemistry and Chemical Engineering, Shaanxi Normal University, Xi'an city, China, 710062

<sup>b</sup>Centre for Clean Environment and Energy, Griffith School of Environment, Gold Coast Campus, Griffith University, QLD 4222, Australia

Correspondent email address: yin\_sw@snnu.edu.cn (S.W. Yin)

**Table S1.** Electronic Energies ( $E_0$ ), Ionization Potential (IP), Electron Affinity (EA), and Polarization Energies ( $P_{\pm}$ ) of naphthalene trimer models with a face-to-face distance range from 3.0 Å to 6.0 Å from BLW method and CDFT method.<sup>a</sup>

| d      | charge | BLW             |               |                   | CDFT            |               |                   |
|--------|--------|-----------------|---------------|-------------------|-----------------|---------------|-------------------|
|        |        | $E_0$<br>(a.u.) | IP/EA<br>(eV) | $P_{\pm}$<br>(eV) | $E_0$<br>(a.u.) | IP/EA<br>(eV) | $P_{\pm}$<br>(eV) |
| trimer |        |                 |               |                   |                 |               |                   |
| 3.0    | -1     | -1157.079271    | -0.613        | -0.006            | -1157.846438    | -0.438        | -0.091            |
|        | +1     | -1156.846396    | 6.950         | -0.862            | -1157.607969    | 6.927         | -0.978            |
|        | 0      | -1157.101786    |               |                   | -1157.862520    |               |                   |
| 3.2    | -1     | -1157.127199    | -0.693        | 0.074             | -1157.889209    | -0.576        | 0.047             |
|        | +1     | -1156.892493    | 7.080         | -0.732            | -1157.648204    | 7.134         | -0.771            |
|        | 0      | -1157.152665    |               |                   | -1157.910360    |               |                   |
| 3.4    | -1     | -1157.152634    | -0.744        | 0.125             | -1157.911779    | -0.653        | 0.124             |
|        | +1     | -1156.916379    | 7.173         | -0.639            | -1157.668901    | 7.262         | -0.643            |
|        | 0      | -1157.179966    |               |                   | -1157.935761    |               |                   |
| 3.6    | -1     | -1157.165916    | -0.774        | 0.155             | -1157.923895    | -0.690        | 0.161             |
|        | +1     | -1156.928190    | 7.243         | -0.569            | -1157.679357    | 7.344         | -0.561            |
|        | 0      | -1157.194364    |               |                   | -1157.949246    |               |                   |
| 3.8    | -1     | -1157.173077    | -0.790        | 0.171             | -1157.930545    | -0.705        | 0.176             |
|        | +1     | -1156.933873    | 7.299         | -0.512            | -1157.684379    | 7.403         | -0.502            |
|        | 0      | -1157.202114    |               |                   | -1157.956448    |               |                   |
| 4.0    | -1     | -1157.177190    | -0.796        | 0.177             | -1157.934648    | -0.707        | 0.178             |
|        | +1     | -1156.936496    | 7.346         | -0.466            | -1157.686839    | 7.450         | -0.455            |
|        | 0      | -1157.206446    |               |                   | -1157.960621    |               |                   |
| 4.2    | -1     | -1157.179859    | -0.797        | 0.178             | -1157.937420    | -0.702        | 0.174             |
|        | +1     | -1156.937698    | 7.387         | -0.425            | -1157.688010    | 7.489         | -0.416            |
|        | 0      | -1157.209150    |               |                   | -1157.963227    |               |                   |
| 4.4    | -1     | -1157.181838    | -0.793        | 0.174             | -1157.939117    | -0.697        | 0.168             |
|        | +1     | -1156.938248    | 7.422         | -0.390            | -1157.688247    | 7.523         | -0.382            |
|        | 0      | -1157.210986    |               |                   | -1157.964728    |               |                   |
| 4.6    | -1     | -1157.183444    | -0.788        | 0.169             | -1157.940125    | -0.691        | 0.163             |
|        | +1     | -1156.938496    | 7.454         | -0.358            | -1157.687946    | 7.554         | -0.352            |
|        | 0      | -1157.212420    |               |                   | -1157.965533    |               |                   |
| 4.8    | -1     | -1157.184745    | -0.782        | 0.163             | -1157.940875    | -0.685        | 0.156             |
|        | +1     | -1156.938525    | 7.482         | -0.330            | -1157.687517    | 7.579         | -0.326            |
|        | 0      | -1157.213468    |               |                   | -1157.966055    |               |                   |
| 5.0    | -1     | -1157.185896    | -0.775        | 0.156             | -1157.941369    | -0.680        | 0.152             |
|        | +1     | -1156.938486    | 7.508         | -0.304            | -1157.686938    | 7.604         | -0.301            |
|        | 0      | -1157.214384    |               |                   | -1157.966366    |               |                   |
| 5.2    | -1     | -1157.186821    | -0.768        | 0.149             | -1157.941874    | -0.675        | 0.146             |
|        | +1     | -1156.938314    | 7.530         | -0.281            | -1157.686445    | 7.625         | -0.280            |

|     |    |              |        |        |              |        |        |
|-----|----|--------------|--------|--------|--------------|--------|--------|
|     | 0  | -1157.215042 |        |        | -1157.966672 |        |        |
| 5.4 | -1 | -1157.187613 | -0.761 | 0.142  | -1157.942319 | -0.669 | 0.140  |
|     | +1 | -1156.938089 | 7.551  | -0.261 | -1157.685947 | 7.645  | -0.260 |
|     | 0  | -1157.215585 |        |        | -1157.966904 |        |        |
| 5.6 | -1 | -1157.188311 | -0.754 | 0.135  | -1157.942857 | -0.663 | 0.134  |
|     | +1 | -1156.937844 | 7.570  | -0.242 | -1157.685589 | 7.664  | -0.241 |
|     | 0  | -1157.216035 |        |        | -1157.967228 |        |        |
| 5.8 | -1 | -1157.188854 | -0.748 | 0.129  | -1157.943302 | -0.657 | 0.128  |
|     | +1 | -1156.937523 | 7.587  | -0.225 | -1157.685196 | 7.681  | -0.225 |
|     | 0  | -1157.216340 |        |        | -1157.967451 |        |        |
| 6.0 | -1 | -1157.189354 | -0.742 | 0.123  | -1157.943722 | -0.651 | 0.122  |
|     | +1 | -1156.937218 | 7.603  | -0.209 | -1157.684831 | 7.696  | -0.209 |
|     | 0  | -1157.216613 |        |        | -1157.967652 |        |        |
|     |    |              | single |        |              |        |        |
|     | -1 | -385.716656  | -0.619 |        | -385.970312  | -0.529 |        |
|     | +1 | -385.452333  | 7.812  |        | -385.699234  | 7.905  |        |
|     | 0  | -385.739404  |        |        | -385.989741  |        |        |

<sup>a</sup>The optimized geometry of neutral naphthalene at B3LYP/6-311G(d,p) level.

**Table S2.** Electronic Energies ( $E_0$ ), Ionization Potential (IP), Electron Affinity (EA), and Polarization Energies ( $P_{\pm}$ ) of the face-to-face orientation of naphthalene trimer model with dielectric constant ( $\epsilon$ ) from BLW method and CDFT method.<sup>a</sup>

| $\epsilon$ | charge | BLW             |               |                   | CDFT            |               |                   |
|------------|--------|-----------------|---------------|-------------------|-----------------|---------------|-------------------|
|            |        | $E_0$<br>(a.u.) | IP/EA<br>(eV) | $P_{\pm}$<br>(eV) | $E_0$<br>(a.u.) | IP/EA<br>(eV) | $P_{\pm}$<br>(eV) |
| 1.50       | -1     | -1157.199265    | -0.268        | -0.351            | -1157.972657    | 0.077         | -0.606            |
|            | +1     | -1156.959083    | 6.804         | -1.008            | -1157.717516    | 6.866         | -1.039            |
|            | 0      | -1157.209129    |               |                   | -1157.969839    |               |                   |
| 2.00       | -1     | -1157.210451    | -0.002        | -0.617            | -1157.993278    | 0.494         | -1.023            |
|            | +1     | -1156.970588    | 6.529         | -1.283            | -1157.733248    | 6.582         | -1.323            |
|            | 0      | -1157.210540    |               |                   | -1157.975116    |               |                   |
| 2.75       | -1     | -1157.219681    | 0.216         | -0.835            | -1158.011174    | 0.853         | -1.382            |
|            | +1     | -1156.980119    | 6.303         | -1.509            | -1157.746358    | 6.354         | -1.551            |
|            | 0      | -1157.211732    |               |                   | -1157.979844    |               |                   |
| 4.00       | -1     | -1157.227427    | 0.399         | -1.018            | -1158.026943    | 1.165         | -1.694            |
|            | +1     | -1156.988150    | 6.112         | -1.700            | -1157.757472    | 6.167         | -1.738            |
|            | 0      | -1157.212753    |               |                   | -1157.984114    |               |                   |
| 8.00       | -1     | -1157.236008    | 0.601         | -1.220            | -1158.045377    | 1.528         | -2.057            |
|            | +1     | -1156.997083    | 5.900         | -1.912            | -1157.769924    | 5.967         | -1.938            |
|            | 0      | -1157.213906    |               |                   | -1157.989217    |               |                   |

<sup>a</sup>The optimized geometry of neutral naphthalene at B3LYP/6-311G(d,p) level.

**Table S3.** Calculated Ionization Potential (IP), Electron Affinity (EA) of gas and solid phase for face-to-face parallel multimers. xM-paral. models mean an excess charge is located on x-2 center molecules combined with two explicitly neutral molecules.<sup>a</sup>

| Method    | Model    | IP <sub>g</sub> | EA <sub>g</sub> | IP <sub>c</sub> | EA <sub>c</sub> |
|-----------|----------|-----------------|-----------------|-----------------|-----------------|
| B3LYP     | 3M-paral | 7.812           | -0.619          | 6.303           | 0.216           |
|           | 4M-paral | 7.061           | -0.204          | 5.885           | 0.569           |
|           | 5M-paral | 6.691           | -0.009          | 5.708           | 0.704           |
|           | 6M-paral | 6.458           | 0.123           | 5.606           | 0.780           |
| CAM-B3LYP | 3M-paral | 8.026           | -0.567          | 6.512           | 0.267           |
|           | 4M-paral | 7.497           | -0.372          | 6.317           | 0.401           |
|           | 5M-paral | 7.238           | -0.317          | 6.233           | 0.441           |
|           | 6M-paral | 7.088           | -0.290          | 6.198           | 0.445           |

<sup>a</sup>The optimized geometry of neutral naphthalene at B3LYP/6-311G(d,p) level.

**Table S4.** Electronic Energies ( $E_0$ ), Ionization Potential (IP), Electron Affinity (EA), and Polarization Energies ( $P_{\pm}$ ) of oligoacenes various model from BLW method.<sup>a</sup>

| charge      | gas-phase       |               |                   | solid-phase     |               |                   |        |
|-------------|-----------------|---------------|-------------------|-----------------|---------------|-------------------|--------|
|             | $E_0$<br>(a.u.) | IP/EA<br>(eV) | $P_{\pm}$<br>(eV) | $E_0$<br>(a.u.) | IP/EA<br>(eV) | $P_{\pm}$<br>(eV) |        |
| Naphthalene |                 |               |                   |                 |               |                   |        |
| 1M          | -1              | -385.561548   | -0.748            | -385.612689     | 0.571         | -1.319            |        |
|             | +1              | -385.302077   | 7.808             | -385.348786     | 6.610         | -1.198            |        |
|             | 0               | -385.589021   |                   | -385.591699     |               |                   |        |
| 5M          | -1              | -1927.907577  | -0.653            | -0.095          | -1927.951980  | 0.319             | -1.067 |
|             | +1              | -1927.662840  | 7.312             | -0.496          | -1927.702788  | 6.462             | -1.346 |
|             | 0               | -1927.931557  |                   |                 | -1927.940249  |                   |        |
| 9M          | -1              | -3470.244027  | -0.514            | -0.234          | -3470.283594  | 0.245             | -0.993 |
|             | +1              | -3469.997504  | 7.223             | -0.585          | -3470.037610  | 6.449             | -1.359 |
|             | 0               | -3470.262927  |                   |                 | -3470.274603  |                   |        |
| Anthracene  |                 |               |                   |                 |               |                   |        |
| 1M          | -1              | -539.243889   | 0.120             |                 |               |                   |        |
|             | +1              | -538.981021   | 7.033             |                 |               |                   |        |
|             | 0               | -539.239488   |                   |                 |               |                   |        |
| 5M          | -1              | -2696.184603  | 0.226             | -0.106          | -2696.231613  | 1.173             | -1.053 |
|             | +1              | -2695.935034  | 6.565             | -0.468          | -2695.976121  | 5.780             | -1.253 |
|             | 0               | -2696.176306  |                   |                 | -2696.188524  |                   |        |
| Tetracene   |                 |               |                   |                 |               |                   |        |
| 1M          | -1              | -692.731232   | 0.687             |                 |               |                   |        |
|             | +1              | -692.467341   | 6.494             |                 |               |                   |        |
|             | 0               | -692.705978   |                   |                 |               |                   |        |
| 5M          | -1              | -3463.526836  | 0.740             | -0.053          | -3463.575543  | 1.659             | -0.972 |
|             | +1              | -3463.278989  | 6.004             | -0.490          | -3463.321590  | 5.251             | -1.243 |
|             | 0               | -3463.499639  |                   |                 | -3463.514567  |                   |        |
| Pentacene   |                 |               |                   |                 |               |                   |        |
| 1M          | -1              | -846.464710   | 1.210             |                 |               |                   |        |
|             | +1              | -846.196924   | 6.076             |                 |               |                   |        |
|             | 0               | -846.420229   |                   |                 |               |                   |        |
| 5M          | -1              | -4231.840714  | 1.286             | -0.076          | -4231.893853  | 2.205             | -0.995 |
|             | +1              | -4231.586881  | 5.621             | -0.455          | -4231.631172  | 4.942             | -1.134 |
|             | 0               | -4231.793462  |                   |                 | -4231.812804  |                   |        |

<sup>a</sup>Molecular crystal geometries were obtained from oligoacene crystals.

**Table S5.** Electronic Energies ( $E_0$ ), Ionization Potential (IP), Electron Affinity (EA), and Polarization Energies ( $P_{\pm}$ ) of naphthalene various model from CDFT method.<sup>a</sup>

|    | charge | gas-phase       |               |                   | solid-phase     |               |                   |
|----|--------|-----------------|---------------|-------------------|-----------------|---------------|-------------------|
|    |        | $E_0$<br>(a.u.) | IP/EA<br>(eV) | $P_{\pm}$<br>(eV) | $E_0$<br>(a.u.) | IP/EA<br>(eV) | $P_{\pm}$<br>(eV) |
| 1M | 0      | -385.840075     |               |                   | -385.844696     |               |                   |
|    | -1     | -385.815952     | -0.656        |                   | -385.874592     | 0.814         | -1.470            |
|    | 1      | -385.549676     | 7.902         |                   | -385.606634     | 6.478         | -1.424            |
| 5M | 0      | -1929.198399    |               |                   | -1929.217745    |               |                   |
|    | -1     | -1929.177189    | -0.577        | -0.079            | -1929.245597    | 0.758         | -1.414            |
|    | 1      | -1928.924565    | 7.451         | -0.451            | -1928.984577    | 6.345         | -1.557            |
| 9M | 0      | -3472.552789    |               |                   | -3472.584617    |               |                   |
|    | -1     | -3472.536472    | -0.444        | -0.212            | -3472.613163    | 0.777         | -1.433            |
|    | 1      | -3472.281969    | 7.369         | -0.533            | -3472.352350    | 6.320         | -1.582            |

<sup>a</sup>Molecular crystal geometries were obtained from crystal structures of naphthalene.

Table S6. Ionization Potential (IP), Electron Affinity (EA) of gas and solid phase of oligoacenes obtained from the solvated 5M model and compare with experimental values.<sup>a</sup>

|             | IP <sub>g</sub>   | EAg               | IP <sub>c</sub>   | EAc               |
|-------------|-------------------|-------------------|-------------------|-------------------|
| CAM-B3LYP   |                   |                   |                   |                   |
| Naphthalene | 8.035             | -0.685            | 6.695             | 0.385             |
| Anthracene  | 7.271             | 0.169             | 6.021             | 1.227             |
| Tetracene   | 6.735             | 0.742             | 5.493             | 1.722             |
| Pentacene   | 6.301             | 1.269             | 5.169             | 2.279             |
| BLYP        |                   |                   |                   |                   |
| Naphthalene | 7.645             | -0.777            | 6.298             | 0.289             |
| Anthracene  | 6.859             | 0.093             | 5.605             | 1.141             |
| Tetracene   | 6.318             | 0.648             | 5.077             | 1.614             |
| Pentacene   | 5.915             | 1.162             | -                 | -                 |
| B3LYP       |                   |                   |                   |                   |
| Naphthalene | 7.808             | -0.748            | 6.462             | 0.319             |
| Anthracene  | 7.033             | 0.120             | 5.780             | 1.173             |
| Tetracene   | 6.494             | 0.687             | 5.251             | 1.659             |
| Pentacene   | 6.076             | 1.210             | 4.942             | 2.205             |
| exp.        |                   |                   |                   |                   |
| Naphthalene | 8.12 <sup>b</sup> | 0.15 <sup>c</sup> | 6.40 <sup>b</sup> | 1.10 <sup>d</sup> |
| Anthracene  | 7.36 <sup>b</sup> | 0.60 <sup>e</sup> | 5.70 <sup>b</sup> | 1.70 <sup>f</sup> |
| Tetracene   | 6.90 <sup>b</sup> | 0.88 <sup>g</sup> | 5.25 <sup>h</sup> | 1.80 <sup>d</sup> |
| Pentacene   | 6.58 <sup>b</sup> | 1.35 <sup>c</sup> | 4.85 <sup>b</sup> | 2.40 <sup>f</sup> |

<sup>a</sup>Molecular crystal geometries were obtained from oligoacene crystals.

<sup>b</sup>Ref 1. <sup>c</sup>Ref 2. <sup>d</sup>Ref 3. <sup>e</sup>Ref 4. <sup>f</sup>Ref 5. <sup>g</sup>Ref 6. <sup>h</sup>Ref 7.



## References

1. N. Sato, K. Seki and H. Inokuchi, *J. Chem. Soc., Faraday Trans. 2*, 1981, **77**, 1621-1633.
2. R. S. Ruoff, K. M. Kadish, P. Boulas and E. C. M. Chen, *J. Phys. Chem.*, 1995, **99**, 8843-8850.
3. K. H. Frank, P. Yannoulis, R. Dudde and E. E. Koch, *J. Chem. Phys.*, 1988, **89**, 7569-7576.
4. S. Chowdhury, T. Heinis and P. Kebarle, *J. Am. Chem. Soc.*, 1986, **108**, 4662-4663.
5. P. E. Schwenn, P. L. Burn and B. J. Powell, *Org. Electron.*, 2011, **12**, 394-403.
6. E. C. M. Chen and W. E. Wentworth, *Mol. Cryst. Liq. Cryst. Incorporating Nonlinear Opt.*, 1989, **171**, 271-285.
7. M. Pope, J. Burgos and J. Giachino, *J. Chem. Phys.*, 1965, **43**, 3367-3371.
